# Supplementary material for: The classification and prediction of green teas by electrochemical response data extraction and fusion approaches based on the combination of e-nose and e-tongue
Source: Royal Society of Chemistry journal article supplement (doi:10.1039/c5ra17978e), 2015-01-01
Supplement: c5ra17978e1.pdf [file c5ra17978e1.pdf]

Table S1 Precision and accuracy of the HPLC method for detecting catechins and caffeine of tea samples.

| Concentration (ng/ml) | catechins         |                  | caffeine |      |
|-----------------------|-------------------|------------------|----------|------|
|                       | RSD% <sup>a</sup> | RE% <sup>b</sup> | RSD%     | RE%  |
| 0.1                   | 7.8               | 5.3              | 8.4      | 10.6 |
| 0.5                   | 9.4               | 6.5              | 7.6      | 9.2  |
| 1                     | 4.6               | 3.8              | 5.9      | -7.6 |

<sup>a</sup> Relative standard deviation (RSD%) was used to evaluate the precision.

<sup>b</sup> Relative error (RE%) was used to evaluate the accuracy.  $RE\% = [(assayed\ value - nominal\ value)/nominal\ value] \times 100\%$ .

The precision for samples was within 15%, and accuracy was between -15 and 15%.

Table S2 Precision for of the GC-MS method for detecting nonanal, linalool oxide, decanal,  $\beta$ -Lonone, methyl salicylate, and geraniol of tea samples.

| Concentration<br>( $\mu$ l/ ml) | Nonanal           | Linalool oxide | Methyl salicylate | Geraniol | Decanal | $\beta$ -Lonone |
|---------------------------------|-------------------|----------------|-------------------|----------|---------|-----------------|
|                                 | RSD% <sup>a</sup> | RSD%           | RSD%              | RSD%     | RSD%    | RSD%            |
| 0.1                             | 8.7               | 11.7           | 8.0               | 9.2      | 8.1     | 12.3            |
| 1                               | 6.2               | 8.5            | 8.8               | 7.6      | 6.7     | 8.3             |
| 5                               | 6.4               | 10.4           | 6.5               | 4.7      | 5.3     | 6.7             |

<sup>a</sup> Relative standard deviation (RSD%) was used to evaluate the precision.

The precision for samples was within 15%.
